# Supplementary material for: Extract of Ephedra sinica Stapf Induces Browning of Mouse and Human White Adipocytes
Source: MDPI journal article supplement (doi:10.3390/foods11071028), 2022-04-01
Supplement: s1 [file s1]

# Supplemental Table S1

**Table S1.** Primer sequences of quantitative PCR (5'-3')

| Mouse           | Forward                | Reverse                 | Accession no. |
|-----------------|------------------------|-------------------------|---------------|
| <i>Tbp</i>      | AACATCTCAGCAACCCACACA  | CTGGTGTGGCAGGAGTGATAG   | NM_013684     |
| <i>Pparg</i>    | TCCATTCAACAAGAGCTGACCC | GGCCATGAGGGAGTTAGAAGG   | NM_001127330  |
| <i>Cebpa</i>    | TGGACAAGAACAGCAACGAGT  | ACCTTCTGTTGCGTCTCCAC    | NM_001287514  |
| <i>Fabp4</i>    | GCTTTGCCACAAGGAAAGTG   | ACGCCCAGTTTGAAGGAAAT    | NM_024406     |
| <i>Ucp1</i>     | AGGATTGGCCTCTACGACTCA  | GCATTCTGACCTTCACGACCT   | NM_009463     |
| <i>Pgc1a</i>    | TCTGGGTGGATTGAAGTGGTG  | TCTGTGAGAACCGCTAGCAAG   | NM_008904     |
| <i>Prdm16</i>   | ACAAGTCCTACACGCAGTTC   | CGTGTAATGGTTCTTGCCCT    | NM_001177995  |
| <i>Elovl3</i>   | CGTAAGCGTCCACTCATCTT   | AGAATGGACGCCAAAGTTCA    | NM_001374665  |
| <i>Elovl6</i>   | CCATCCCCAGATGCTTTGAA   | GGATTTGGCTTTGCTTGACC    | NM_130450     |
| <i>Dio2</i>     | GTGAGCTGGGAAAGTTGCTA   | AAGAATAGAGCCGGTGCTTG    | NM_010050     |
| <i>Cidea</i>    | AAATGGACACCGGGTAGTAAG  | TTTGACATTGAGACAGCCGA    | NM_007702     |
| <i>Cidec</i>    | GGCCTGAATCAAGACAACCA   | GAGTGATCAGAGTCCCAGGT    | NM_001301295  |
| <i>Ppara</i>    | GAACAAAGACGGGATGCTGAT  | CAGCCACAAACAGGGAAATG    | NM_001113418  |
| <i>Ebf2</i>     | CTACGGCACACCACACAATAA  | TGATACCCATCATACCGCTGT   | NM_001276387  |
| <i>Cited1</i>   | ATTTATCGGACTTCTGCCAG   | TTGCGATCCTTCACTCCAAG    | NM_001276466  |
| <i>Tbx1</i>     | TGGGACGAGTTCAATCAGC    | TGTCATCTACGGGCACAAAG    | NM_001285472  |
| <i>Shox2</i>    | CCCACTATCCAGACGCTTTC   | ATAGGGTGCAACTCTACAAGC   | NM_001302357  |
| <i>Tmem26</i>   | CTCTGGTCTCTGGCATTCTTG  | CATAGATCCGCACTGTACTGG   | NM_177794     |
| <i>P2rx5</i>    | ACTTTGTCATTCCGTCTCAGG  | CAACAGACTCCCCAGCGTGACA  | NM_001376982  |
| <i>Pat2</i>     | ATGTCTGTGACCAAGAGTGC   | CCAGGATCCCAGTCCAGCGAATG | NM_153170     |
| <i>Car4</i>     | GTAGGAGACAAGGTGAACAAGG | AGTTTGGTGTGGTTAGTGAGC   | NM_007607     |
| <i>Cyts</i>     | AAATCTCCACGGTCTGTTCG   | GTCTGCCCTTTCTCCCTTC     | NM_007808     |
| <i>Tfam</i>     | GGAATGTGGAGCGTGCTAAAA  | TTGGGTAGCTGTTCTGTGGAA   | NM_009360     |
| <i>Nrf1</i>     | AAGATGCTAATGGCCTGGTCC  | ATATCCTGGTGGTCACTGGGG   | NM_001164226  |
| <i>Nrf2</i>     | CGCTGAAGGCACAATGGAATT  | GCTTTAGGGCCGTTCTGTTTG   | NM_001399226  |
| <i>Cox8b</i>    | AAAGCCCATGTCTCTGCCAA   | GCTAAGACCCATCCTGCTG     | NM_007751     |
| <i>Cox7a1</i>   | AGAAAACCGTGTGGCAGAGA   | CCAGCCCAAGCAGTATAAGC    | NM_009944     |
| Human           | Forward                | Reverse                 | Accession no. |
| <i>GAPDH</i>    | GGAAGGTGAAGGTCGGAGTC   | GAAGGGGTCATTGATGGCAAC   | NM_001256799  |
| <i>UPC1</i>     | ACTTGGTGTCGGCTCTTATCG  | CCGTTGGTCCTTCGTTAGTGA   | NM_021833     |
| <i>PPARGC1A</i> | ACCCACCACTCCTCCTCATAA  | GTCTTCCTTTCCTCGTGTCCA   | NM_001330751  |
| <i>CIDEA</i>    | TGGGAGACAACACGCATTTCA  | TCATACATGGTGGCCTTCACG   | NM_001279     |
| <i>CIDEA</i>    | AAGTCCCTTAGCCTTCTCTACC | CCTTCCTCACGCTTCGATCC    | NM_001199551  |

|                 |                        |                        |              |
|-----------------|------------------------|------------------------|--------------|
| <i>CITED1</i>   | CCTCACCTGCGAAGGAGGA    | GGAGAGCCTATTGGAGATCCC  | NM_001144885 |
| <i>FABP3</i>    | ACCAAGCCTACCACAATCATCG | CAAGTTTCCCTCCATCCAGTGT | NM_001320996 |
| <i>SLC25A20</i> | AGACACAGCCACCGAGTTTG   | TCCCCAAACCAAACCCAAAGA  | NM_000387    |
| <i>CPT2</i>     | CAGCAGCCAAAGGGATCATCT  | TACCCAACACCAAAGCCATCA  | NM_000098    |
| <i>CYCS</i>     | TGGGTGATGTTGAGAAAGGCA  | TGGCGGCTGTGTAAGAGTATC  | NM_018947    |
| <i>COX7A1</i>   | GAGTGCGCGAGAAACAGAAG   | CCCAGCCAAGGGAGTACAAG   | NM_001864    |

---

## Supplemental Figure S1

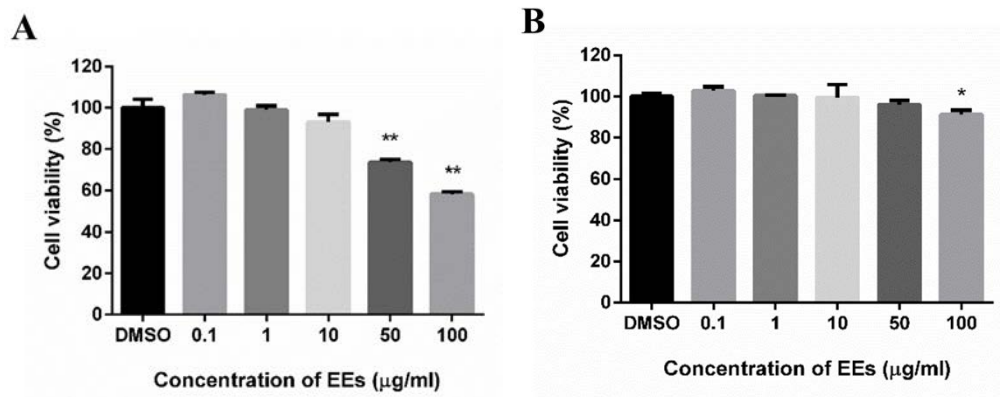

**Figure S1.** Cytotoxic effects of EEs on mIPA and hADSCs. (A) Cell viability assay performed on mIPA treated with EEs in a dose-dependent manner. (B) Cell viability assays were performed for hADSCs treated with various dosages of EEs. Results are shown as mean  $\pm$  SEM ( $n = 3$ ). \*,  $p < 0.05$ ; \*\*,  $p < 0.01$  compared with the untreated control group.

## Supplemental Figure S2

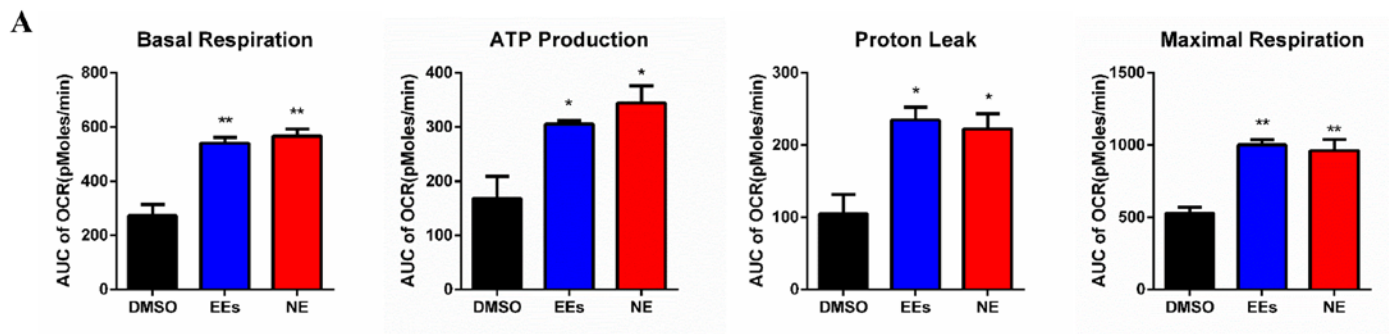

**Figure S2.** Effects of EEs on cellular respiration rate of differentiated mIPA. (A) Basal respiration, ATP production, proton leak, and maximal respiration were assessed. Results are shown as mean  $\pm$  SEM (n = 3). \*,  $p < 0.05$ ; \*\*,  $p < 0.01$  compared with the untreated control group.

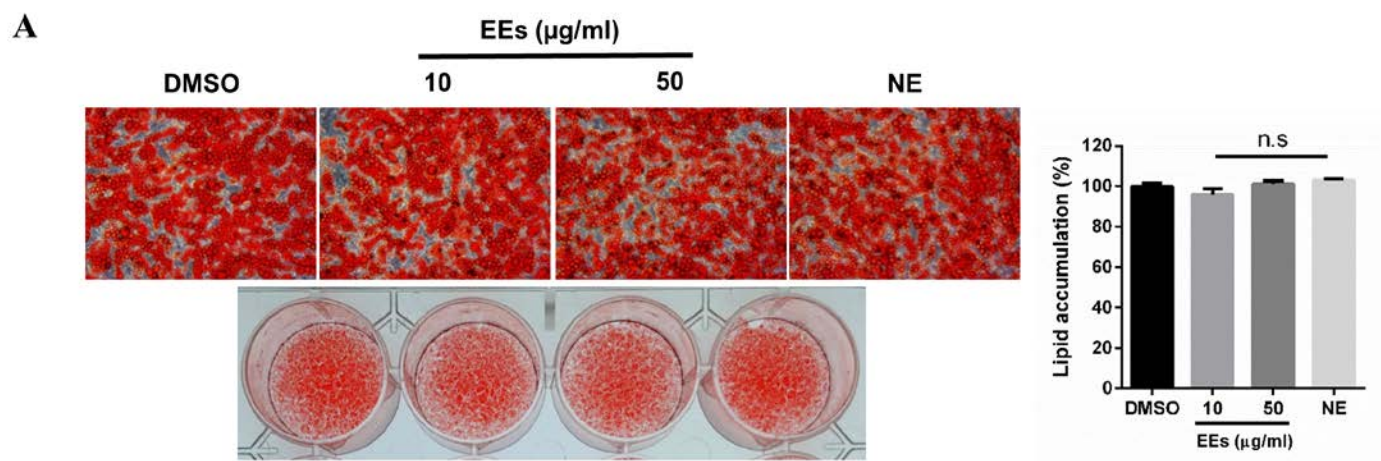

**Figure S3.** Effects of EEs on lipid accumulation of differentiated hADSC. (A) ORO staining performed after EEs treatment. Results are shown as mean  $\pm$  SEM ( $n = 3$ ). \*,  $p < 0.05$ ; \*\*,  $p < 0.01$  compared with the untreated control group.
